# Supplementary material for: HILPDA: A Novel Prognostic Biomarker for Lung Adenocarcinoma Identified by Integrated Bioinformatic Analysis and Experimental Validation
Source: Research Square preprint supplement (doi:10.21203/rs.3.rs-8572177/v1), 2026-02-16
Supplement: Supplementary file 1 [file 15a8df494669567e14cd4cb4.docx]

Figure 10 Fluorescence imaging and expression analysis of Lentivirus-Infected Cells


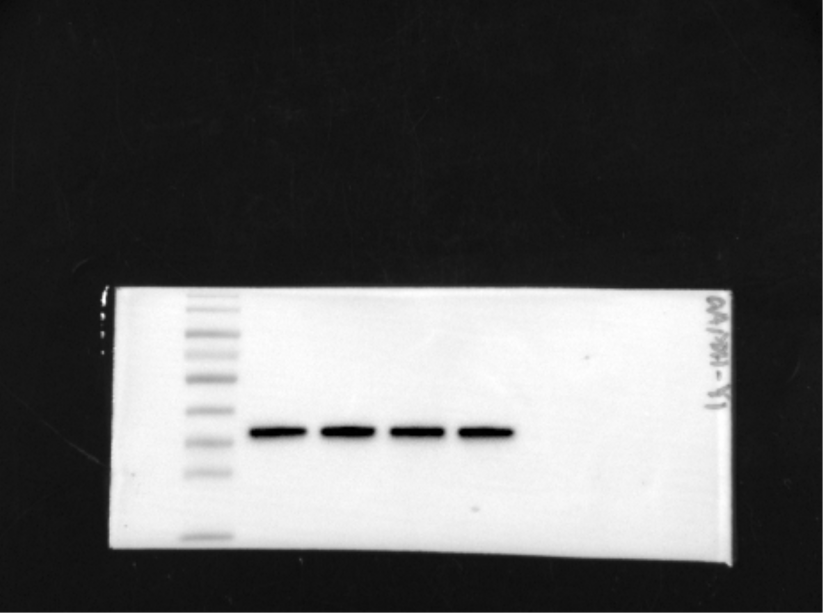

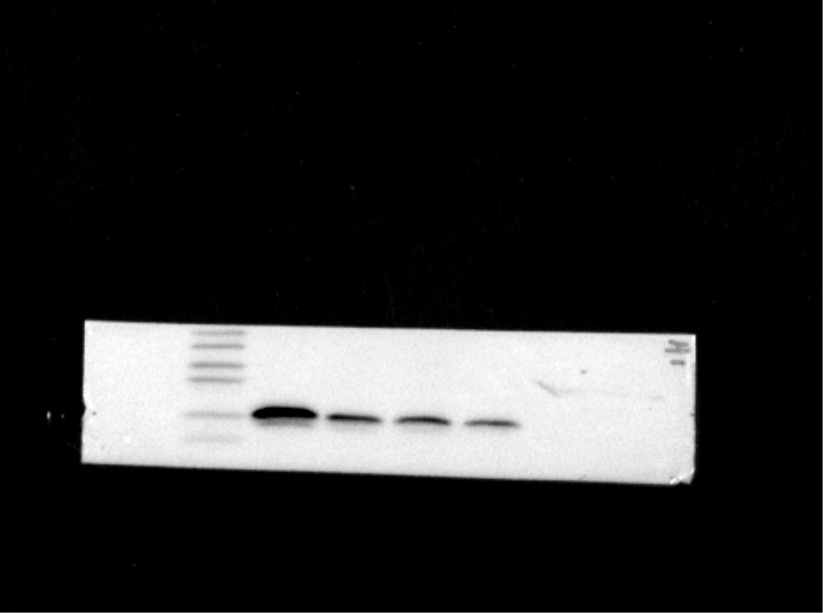


Figure 10-B

HILPDA

Figure 10-B

GAPDH

Figure 11 The fluorescence imaging and expression level of lentivirus-shRNA3 infected into cells


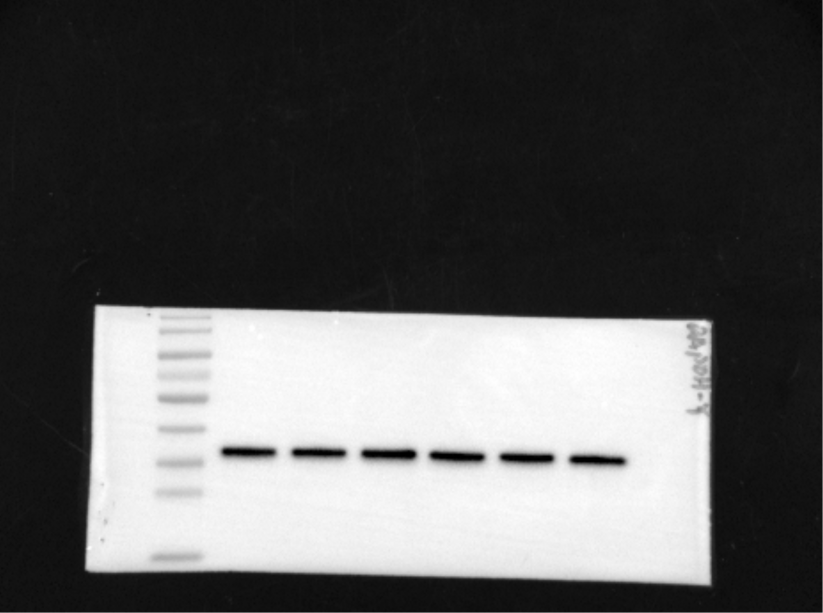

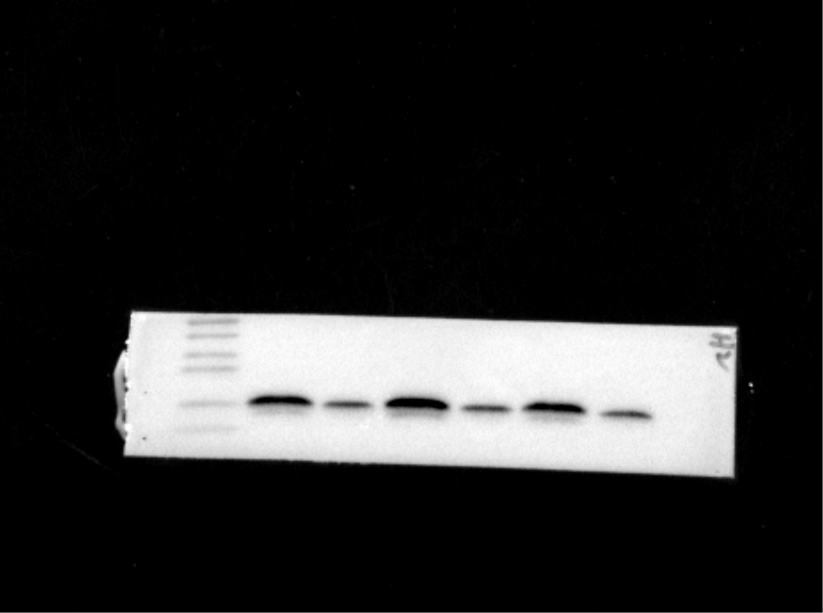


Figure 11-B

GAPDH

Figure 11-B

HILPDA
