# Supplementary figures and images for: HILPDA: A Novel Prognostic Biomarker for Lung Adenocarcinoma Identified by Integrated Bioinformatic Analysis and Experimental Validation
Source: Research Square preprint supplement (doi:10.21203/rs.3.rs-8572177/v1), 2026-02-16

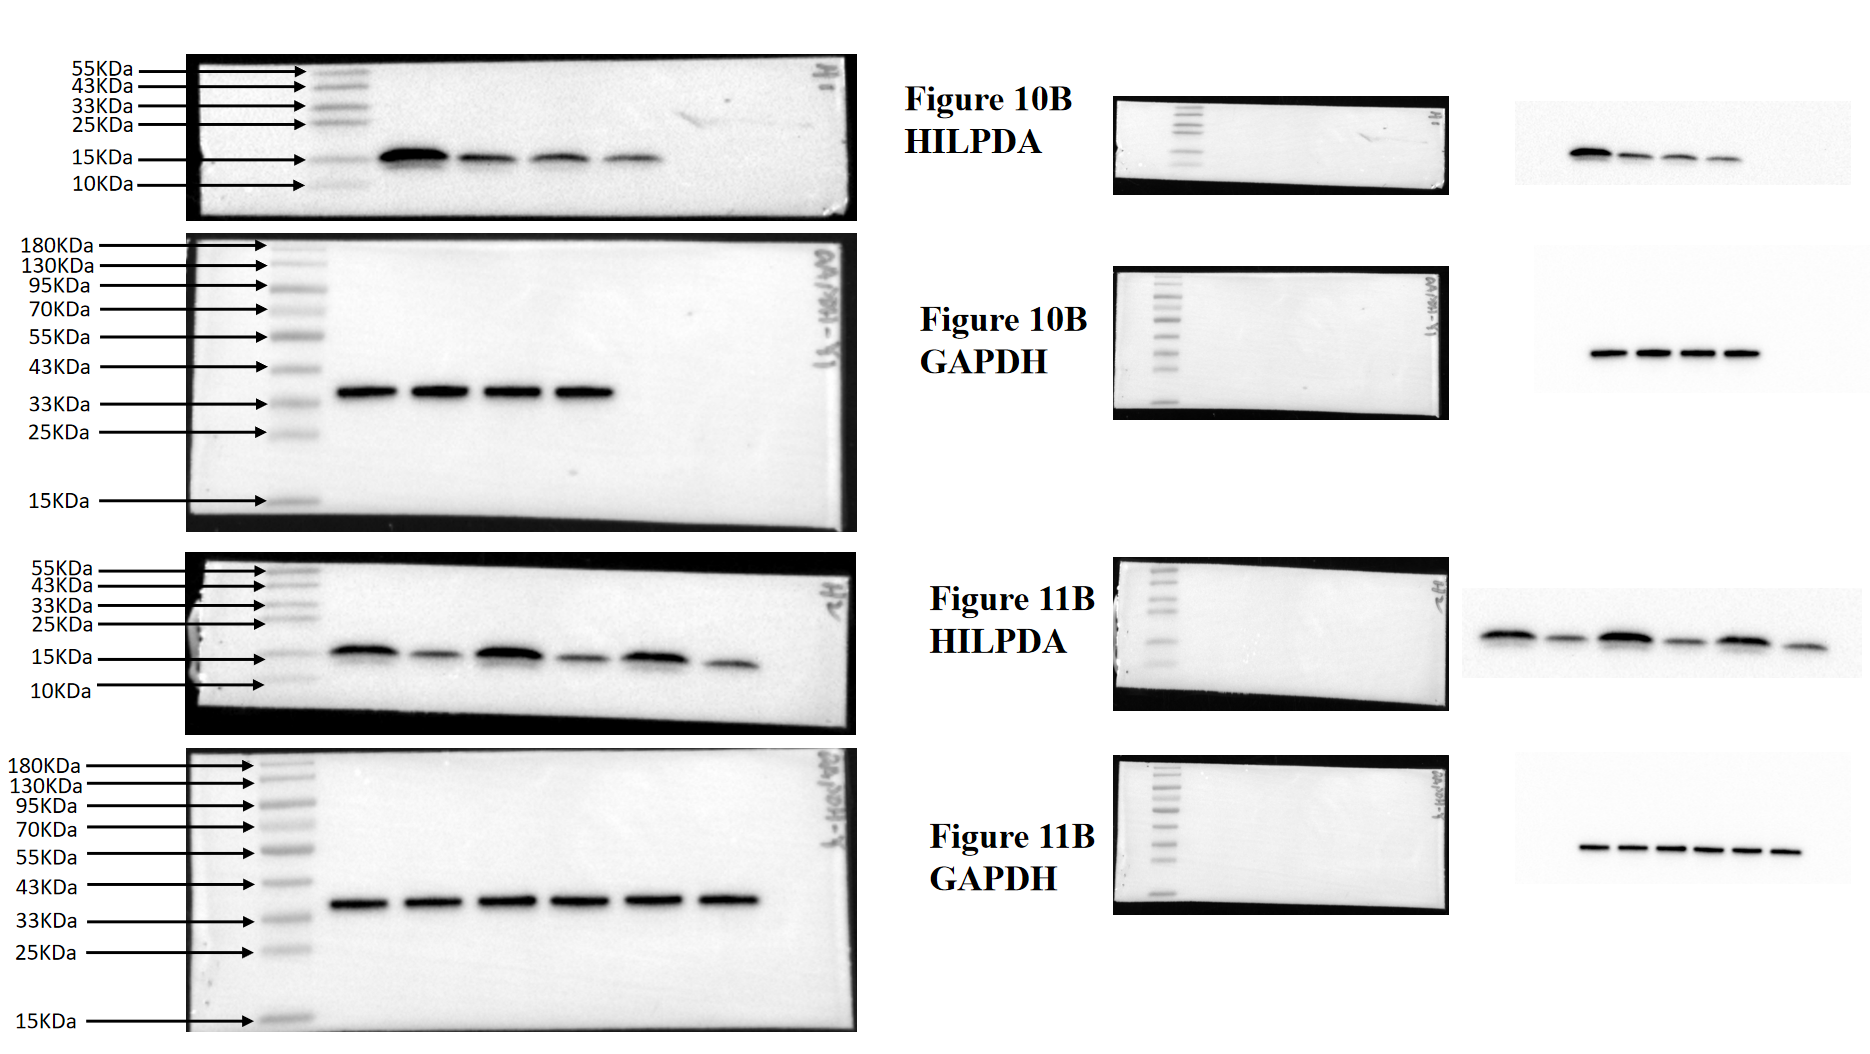

Supplement: Supplementary file 2 [file c14ea5a7361b5eb86fd96b0a.docx]
